# Supplementary material for: Combination of Antiretroviral Drugs Zidovudine and Efavirenz Impairs Tumor Growths in a Mouse Model of Cancer
Source: Viruses. 2021 Nov 30;13(12):2396. doi: 10.3390/v13122396 (PMC8703283; doi:10.3390/v13122396)
Supplement: Supplementary file 1 [file viruses-13-02396-s001.zip › viruses-1458628-supplementary.pdf]

Supplementary Figure

A

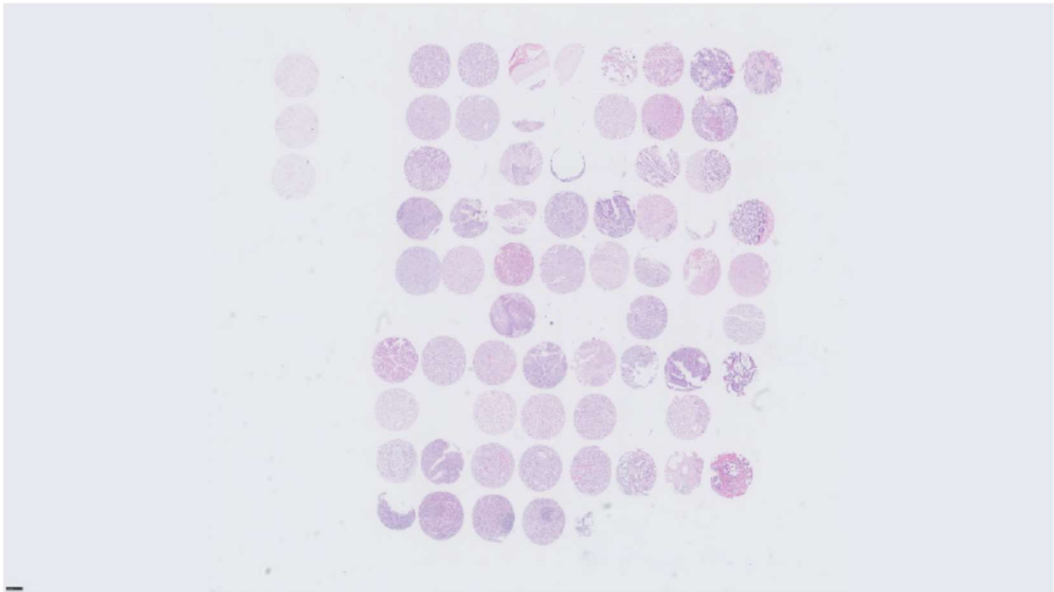

B

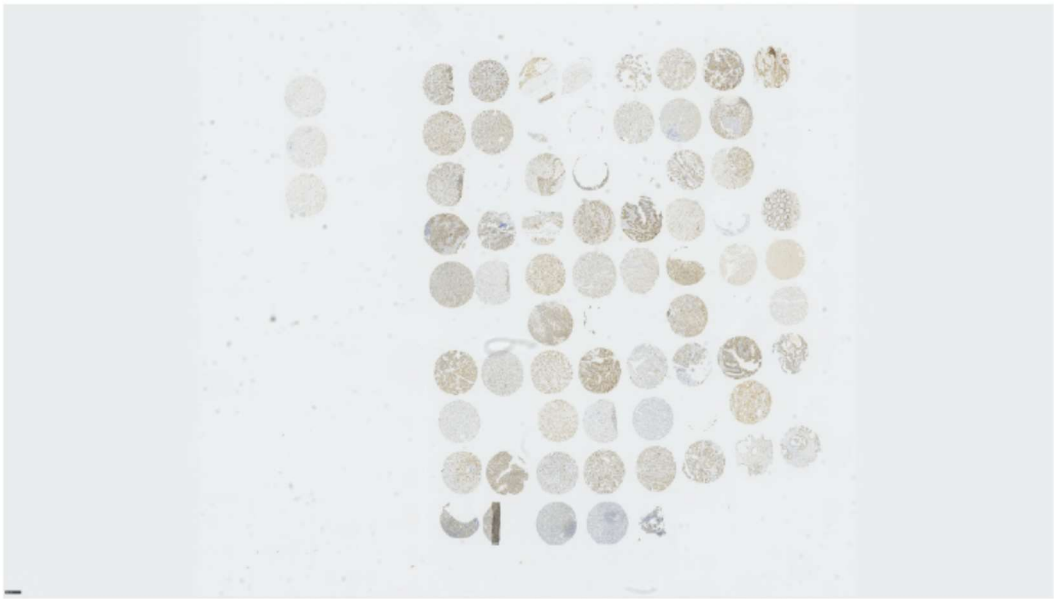

C

|           | x  | 1                    | 2                           | 3                    | 4                   | 5                  | 6                       | 7                      | 8                           |
|-----------|----|----------------------|-----------------------------|----------------------|---------------------|--------------------|-------------------------|------------------------|-----------------------------|
| marking y | 1  | Testis/ Seminom      | Testis/ Seminom             | Testis/ Teratom      | Testis/ normal      | Plazent            | Plazenta                | Mammal/ Inv. Duct Ca   | Mammal/ Inv. Duct Ca        |
| y         | 2  | Mammal/ Inv. Duct Ca | Mammal/ Inv. lob. Ca        | Liver/ HCC           | Liver/ HCC          | Liver/ CholangioCa | Liver/ normal           | Lung/ Adenoca          | Lung/ Adenoca               |
| y         | 3  | Lung/ Adenoca        | Lung/ Adenoca               | Lung/ Plattenepithel | Lung/ SCLC          | Pancreas/ normal   | Pancreas/ Neuroendok Ca | Pancreas/ Duct Adenoca | Pancreas/ Anaplastisches Ca |
| y         | 4  | Ovary/ seröses Ca    | Ovary/ endom. Ca            | Ovary/ muzinöses Ca  | Ovary/ seröses Ca   | Colon/ AdenoCa     | Colon/ AdenoCa          | Colon/ muzinöses Adeno | Colon/ normale mucosa       |
| y         | 5  | GIST/ CD117          | Leiomyosarkom               | Leiomyosarkom        | Leiomyosarkom       | Rhabdomyosarkom    | Brain/ Glioblastom      | Brain/ Astrozytom      | Brain/ Hypocampus           |
| y         | 6  | Pancreas/ normal     | Skin/ Plattenepit           | Skin/ Plattenepit    | Skin/ Merkelzell CA | Skin/ Melanom      | LN/ Melanommeta         | PanMelanom Testblock   | PanMelanom Testblock        |
| y         | 7  | Thyroid/ pap. Ca     | Thyroid/ anapl. Ca          | Thyroid/ Folli. Ca   | Uterus/ AdenoCa     | Uterus/ AdenoCa    | Uterus/ AdenoCa         | Uterus/ normal         | Uterus/ normal              |
| y         | 8  | ccRCC                | ccRCC                       | ccRCC                | ccRCC               | ccRCC              | pap. RCC                | kidney/ normal         | kidney/ normal              |
| y         | 9  | UrothelCa            | UrothelCa                   | UrothelCa            | PCA                 | PCA                | PCA                     | BPH                    | BPH                         |
| y         | 10 | Tonsille/ normal     | spleen/ Marginalzonelymphom | spleen/ normal       | spleen/ normal      | LN/ HodgkinLymphom | LN/ Mantelzelllymphom   |                        |                             |

Supplementary Figure S1: (A) H&E staining of complete tumor microarray of 78 different tumor entities. (B) LINE1 staining of complete tumor microarray of different tumor entities. (C) Detailed information of tumor entities.
